# Supplementary material for: MiST: A new approach to variant detection in deep sequencing datasets
Source: Nucleic Acids Res. 2013 Jul 4;41(16):e154. doi: 10.1093/nar/gkt551 (PMC3763541; doi:10.1093/nar/gkt551)
Supplement: Supplementary Data [file supp_gkt551_nar-01148-met-n-2013-File013.pdf]

Nomenclature: *In* is intronic, *ins* is insertion, *fs* is frameshift, *ms* is missense, *utr* is untranslated, *syn* is synonymous and *P-P* is probably-pathogenic.
